# Supplementary material for: Electrochemical Performance of Potassium Hydroxide and Ammonia Activated Porous Nitrogen-Doped Carbon in Sodium-Ion Batteries and Supercapacitors
Source: MDPI journal article supplement (doi:10.3390/inorganics10110198), 2022-11-07
Supplement: s1 [file s1]

# Electrochemical performance of potassium hydroxide and ammonia activated porous nitrogen-doped carbon in sodium-ion batteries and supercapacitors

Yuliya V. Fedoseeva <sup>1,\*</sup>, Elena V. Shlyakhova <sup>1</sup>, Svetlana G. Stolyarova <sup>1</sup>, Anna A. Vorfolomeeva <sup>1</sup>, Alina D. Nishchakova <sup>1</sup>, Mariya A. Grebenkina <sup>1</sup>, Anna A. Makarova <sup>2</sup>, Konstantin A. Kovalenko <sup>1</sup>, Alexander V. Okotrub <sup>1</sup>, Lyubov G. Bulusheva <sup>1,\*</sup>

<sup>1</sup> Nikolaev Institute of Inorganic Chemistry SB RAS, 3 Acad. Lavrentiev Ave., 630090 Novosibirsk, Russia

<sup>2</sup> Physical Chemistry, Institute of Chemistry and Biochemistry, Free University of Berlin, 14195 Berlin, Germany

\* Correspondence: fedoseeva@niic.nsc.ru (Y.V.F), bul@niic.nsc.ru (L.G.B.); Tel.: +73833305352 (Y.V.F.&L.G.B.)

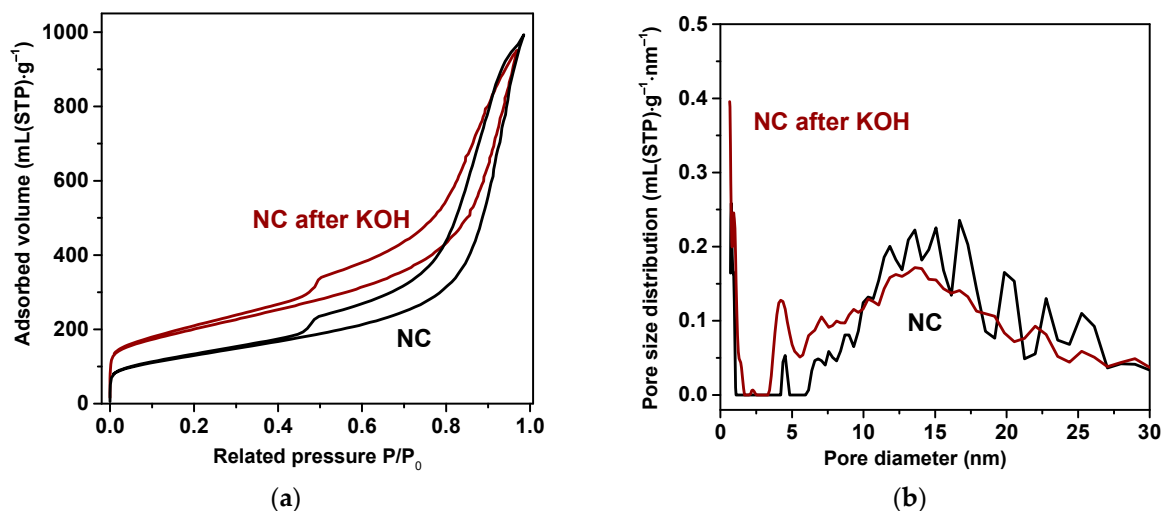

**Figure S1.** (a) Nitrogen adsorption-desorption isotherms at 77 K and (b) DFT pore size distributions of NC and NC after the treatment with potassium hydroxide.

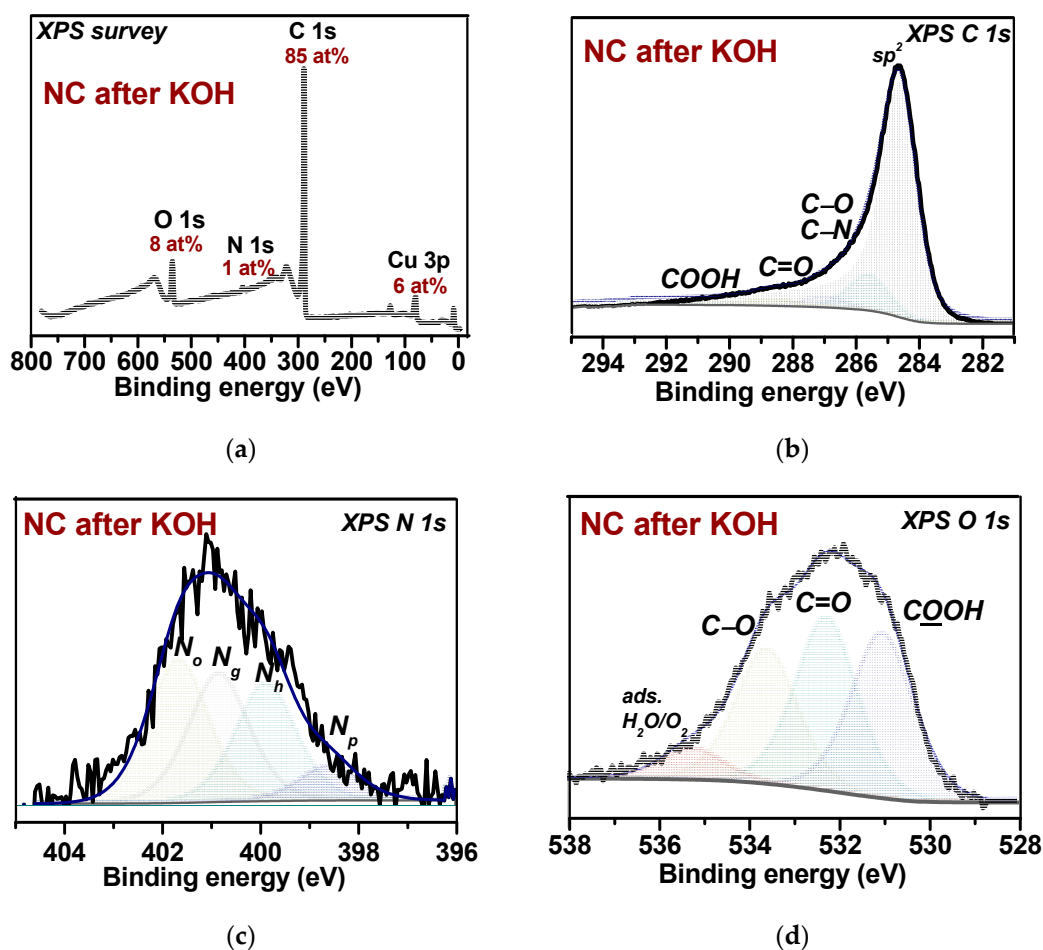

**Figure S2.** XPS (a) survey, (b) C 1s, (c) N 1s and (d) O 1s spectra of NC after the treatment with potassium hydroxide.

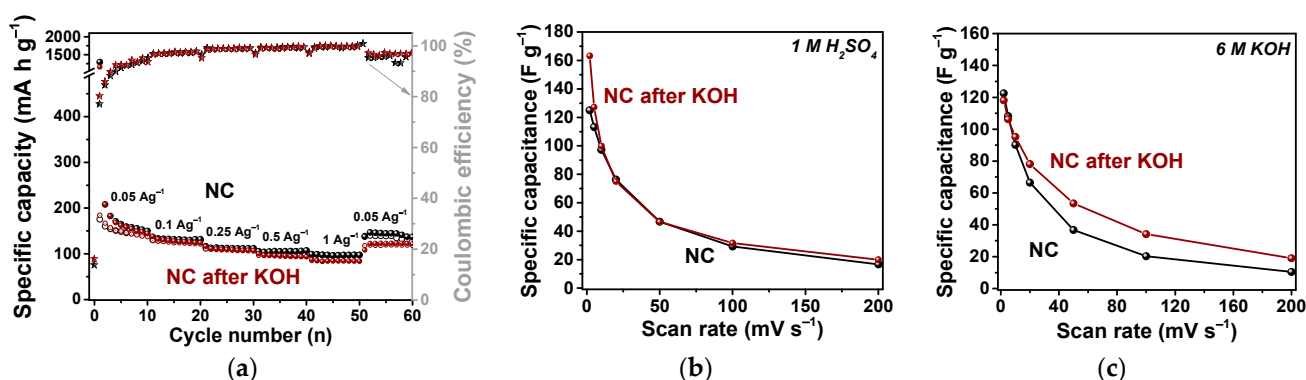

**Figure S3.** (a) Rate capability of NC and NC after KOH-treatment electrodes at current densities of 0.05–1.00 A g<sup>-1</sup> in SIB cell; gravimetric capacitance of NC and NC after KOH-treatment at scan rates of 2–200 mV s<sup>-1</sup> in (b) 1 M H<sub>2</sub>SO<sub>4</sub> and (c) 1 M KOH electrolytes in supercapacitors.

**Table S1.** Capacitance in aqueous supercapacitors (SCs) in 1 M H<sub>2</sub>SO<sub>4</sub> and 6 M KOH electrolytes and capacity in sodium-ion batteries (SIB) for nitrogen-doped carbon materials are reported in the literature

| Material                                                  | Nitrogen concentration | Specific surface area               | Capacitance in aqueous SCs or SIB capacity                                                     |
|-----------------------------------------------------------|------------------------|-------------------------------------|------------------------------------------------------------------------------------------------|
| <b>SCs in 1 M H<sub>2</sub>SO<sub>4</sub> electrolyte</b> |                        |                                     |                                                                                                |
| activated carbon <sup>1</sup>                             | 2 wt. %                | 2062 m <sup>2</sup> g <sup>-1</sup> | 358 Fg <sup>-1</sup> at 0.5 mV s <sup>-1</sup>                                                 |
| nitrogen-doped porous carbon <sup>2</sup>                 | 3.3 wt. %              | 1463 m <sup>2</sup> g <sup>-1</sup> | 282 Fg <sup>-1</sup> at 2 mV s <sup>-1</sup><br>148 Fg <sup>-1</sup> at 100 mV s <sup>-1</sup> |
| mica templated carbon <sup>3</sup>                        | 10 wt. %               | 87.5 m <sup>2</sup> g <sup>-1</sup> | 105 Fg <sup>-1</sup> at 1 mV s <sup>-1</sup>                                                   |
| MOF-templated porous carbon <sup>4</sup>                  | 5.3 wt. %              | 822 m <sup>2</sup> g <sup>-1</sup>  | 72 Fg <sup>-1</sup> at 5 mV s <sup>-1</sup>                                                    |
|                                                           | 5.2 wt. %              | 586 m <sup>2</sup> g <sup>-1</sup>  | 37 Fg <sup>-1</sup> at 5 mV s <sup>-1</sup>                                                    |
| N-doped reduced graphene oxide <sup>5</sup>               | 3 at. %                | 355 m <sup>2</sup> g <sup>-1</sup>  | 220 Fg <sup>-1</sup> at 25 mV s <sup>-1</sup>                                                  |
| porous carbon nanosheets <sup>6</sup>                     | 12.7 at. %             | 410 m <sup>2</sup> g <sup>-1</sup>  | 305 Fg <sup>-1</sup> at 2 mV s <sup>-1</sup>                                                   |
| activated carbon <sup>7</sup>                             | 5.5 at. %              | 657 m <sup>2</sup> g <sup>-1</sup>  | 200 Fg <sup>-1</sup> at 10 mV s <sup>-1</sup>                                                  |
| <b>SCs in 6 M KOH electrolyte</b>                         |                        |                                     |                                                                                                |
| nitrogen-containing carbon nanotubes <sup>8</sup>         | 6.1 wt. %              | -                                   | 160 Fg <sup>-1</sup> at 50 mV s <sup>-1</sup>                                                  |
| nitrogen-doped carbon nanoparticles <sup>9</sup>          | 10.5 wt. %             | 365 m <sup>2</sup> g <sup>-1</sup>  | 156 Fg <sup>-1</sup> at 2 mV s <sup>-1</sup><br>80 Fg <sup>-1</sup> at 100 mV s <sup>-1</sup>  |
| nitrogen-doped carbon microfibers <sup>10</sup>           | 4.5 wt. %              | 230 m <sup>2</sup> g <sup>-1</sup>  | 189 Fg <sup>-1</sup> at 5 mV s <sup>-1</sup>                                                   |

<sup>1</sup> A. Elmouwahidi, Z. Zapata-Benabith, F. Carrasco-Marín, C. Moreno-Castilla, Activated carbons from KOH-activation of argan (*Argania spinosa*) seed shells as supercapacitor electrodes, *Bioresource Technology*. 111 (2012) 185–190. <https://doi.org/10.1016/j.biortech.2012.02.010>.

<sup>2</sup> M. Zhou, F. Pu, Z. Wang, S. Guan, Nitrogen-doped porous carbons through KOH activation with superior performance in supercapacitors, *Carbon*. 68 (2014) 185–194. <https://doi.org/10.1016/j.carbon.2013.10.079>.

<sup>3</sup> M. Kodama, J. Yamashita, Y. Soneda, H. Hatori, S. Nishimura, K. Kamegawa, Structural characterization and electric double layer capacitance of template carbons, *Materials Science and Engineering: B*. 108 (2004) 156–161. <https://doi.org/10.1016/j.mseb.2003.10.097>.

<sup>4</sup> Q. Wang, W. Xia, W. Guo, L. An, D. Xia, R. Zou, Functional Zeolitic-Imidazolate-Framework-Templated Porous Carbon Materials for CO<sub>2</sub> Capture and Enhanced Capacitors, *Chem. Asian J.* 8 (2013) 1879–1885. <https://doi.org/10.1002/asia.201300147>.

<sup>5</sup> Y.-H. Lee, K.-H. Chang, C.-C. Hu, Differentiate the pseudocapacitance and double-layer capacitance contributions for nitrogen-doped reduced graphene oxide in acidic and alkaline electrolytes, *Journal of Power Sources*. 227 (2013) 300–308. <https://doi.org/10.1016/j.jpowsour.2012.11.026>.

<sup>6</sup> Q. Wang, J. Yan, Z. Fan, Nitrogen-doped sandwich-like porous carbon nanosheets for high volumetric performance supercapacitors, *Electrochimica Acta*. 146 (2014) 548–555. <https://doi.org/10.1016/j.electacta.2014.09.036>.

<sup>7</sup> W. Zhang, Z. Ren, Z. Ying, X. Liu, H. Wan, Activated nitrogen-doped porous carbon ensemble on montmorillonite for high-performance supercapacitors, *Journal of Alloys and Compounds*. 743 (2018) 44–51. <https://doi.org/10.1016/j.jallcom.2017.12.327>.

<sup>8</sup> O. Ornelas, J.M. Sieben, R. Ruiz-Rosas, E. Morallón, D. Cazorla-Amorós, J. Geng, N. Soin, E. Siores, B.F.G. Johnson, On the origin of the high capacitance of nitrogen-containing carbon nanotubes in acidic and alkaline electrolytes, *Chem. Commun.* 50 (2014) 11343–11346. <https://doi.org/10.1039/C4CC04876H>.

<sup>9</sup> L.-P. Lv, Z.-S. Wu, L. Chen, H. Lu, Y.-R. Zheng, T. Weidner, X. Feng, K. Landfester, D. Crespy, Precursor-controlled and template-free synthesis of nitrogen-doped carbon nanoparticles for supercapacitors, *RSC Adv.* 5 (2015) 50063–50069. <https://doi.org/10.1039/C5RA06697B>.

<sup>10</sup> R. Liu, L. Pan, L. Wan, D. Wu, An evaporation-induced tri-consistent assembly route towards nitrogen-doped carbon microfibers with ordered mesopores for high performance supercapacitors, *Phys. Chem. Chem. Phys.* 17 (2015) 4724–4729. <https://doi.org/10.1039/C4CP05211K>.

|                                                                          |             |                                     |                                                                                                                                                  |
|--------------------------------------------------------------------------|-------------|-------------------------------------|--------------------------------------------------------------------------------------------------------------------------------------------------|
| <b>nitrogen-containing mesoporous carbon<sup>11</sup></b>                | 8.4 wt. %   | 930 m <sup>2</sup> g <sup>-1</sup>  | 230 Fg <sup>-1</sup> at 5 mV s <sup>-1</sup><br>215 Fg <sup>-1</sup> at 100 mV s <sup>-1</sup>                                                   |
| <b>nitrogen-doped hierarchically porous carbon material<sup>12</sup></b> | 6.3 at. %   | 1091 m <sup>2</sup> g <sup>-1</sup> | 187 Fg <sup>-1</sup> at 5 mV s <sup>-1</sup>                                                                                                     |
| <b>SIBs</b>                                                              |             |                                     |                                                                                                                                                  |
| <b>N-rich carbon nanosheets<sup>13</sup></b>                             | 12 at. %    | 352 m <sup>2</sup> g <sup>-1</sup>  | 185 mAhg <sup>-1</sup> at 0.1 Ag <sup>-1</sup>                                                                                                   |
| <b>N-doped nano-sized carbon spheres<sup>14</sup></b>                    | 9.12 at. %  | 604 m <sup>2</sup> g <sup>-1</sup>  | 245 mAhg <sup>-1</sup> at 0.03 Ag <sup>-1</sup>                                                                                                  |
| <b>N-doped amorphous carbon nanofibers<sup>15</sup></b>                  | 7.29 at. %  | 370 m <sup>2</sup> g <sup>-1</sup>  | 321 mA h g <sup>-1</sup> at 0.05 Ag <sup>-1</sup>                                                                                                |
| <b>N-doped carbon/graphene<sup>16</sup></b>                              | 7.54 at. %  | 94 m <sup>2</sup> g <sup>-1</sup>   | 303 mAhg <sup>-1</sup> at 0.05 Ag <sup>-1</sup><br>274 mAhg <sup>-1</sup> at 0.1 Ag <sup>-1</sup><br>94 mAhg <sup>-1</sup> at 5 Ag <sup>-1</sup> |
| <b>N-rich hollow carbon-onion-constructed nanosheets<sup>17</sup></b>    | 16.54 at. % | 108 m <sup>2</sup> g <sup>-1</sup>  | 262 mAhg <sup>-1</sup> at 0.1 Ag <sup>-1</sup><br>151 mAhg <sup>-1</sup> at 5 Ag <sup>-1</sup>                                                   |
| <b>N-doped porous carbon nanofibers<sup>18</sup></b>                     | -           | 138 m <sup>2</sup> g <sup>-1</sup>  | 174 mAhg <sup>-1</sup> at 0.05 Ag <sup>-1</sup><br>156 mAhg <sup>-1</sup> at 0.1 Ag <sup>-1</sup>                                                |
| <b>N-doped carbon fiber aerogels<sup>19</sup></b>                        | 12.2 at. %  | 65 m <sup>2</sup> g <sup>-1</sup>   | ~170 mAhg <sup>-1</sup> at 0.1 Ag <sup>-1</sup><br>~140 mAhg <sup>-1</sup> at 1 Ag <sup>-1</sup>                                                 |
| <b>N-doped carbon nanobubbles<sup>20</sup></b>                           | 11.6 at. %  | 672 m <sup>2</sup> g <sup>-1</sup>  | 248 mAhg <sup>-1</sup> at 0.3 Ag <sup>-1</sup>                                                                                                   |
| <b>N-doped carbon nanotubes<sup>21</sup></b>                             | 5 at. %     | 737 m <sup>2</sup> g <sup>-1</sup>  | 185 mAhg <sup>-1</sup> at 0.1 Ag <sup>-1</sup><br>153 mAhg <sup>-1</sup> at 1 Ag <sup>-1</sup>                                                   |

<sup>11</sup> A. Olejniczak, M. Leżańska, A. Pacuła, P. Nowak, J. Włoch, J.P. Łukaszewicz, Nitrogen-containing mesoporous carbons with high capacitive properties derived from a gelatin biomolecule, *Carbon*. 91 (2015) 200–214. <https://doi.org/10.1016/j.carbon.2015.04.025>.

<sup>12</sup> R. Zeng, X. Tang, B. Huang, K. Yuan, Y. Chen, Nitrogen-Doped Hierarchically Porous Carbon Materials with Enhanced Performance for Supercapacitor, *ChemElectroChem*. 5 (2018) 515–522. <https://doi.org/10.1002/celec.201701021>.

<sup>13</sup> B. Yang, S. Liu, Y. V. Fedoseeva, A. V. Okotrub, A.A. Makarova, X. Jia, J. Zhou, Engineering selenium-doped nitrogen-rich carbon nanosheets as anode materials for enhanced Na-Ion storage, *J. Power Sources*. 493 (2021) 229700. <https://doi.org/10.1016/j.jpowsour.2021.229700>.

<sup>14</sup> A. Agrawal, S. Janakiraman, K. Biswas, A. Venimadhav, S.K. Srivastava, S. Ghosh, Understanding the improved electrochemical performance of nitrogen-doped hard carbons as an anode for sodium ion battery, *Electrochim. Acta*. 317 (2019) 164–172. <https://doi.org/10.1016/j.electacta.2019.05.158>.

<sup>15</sup> R. Hao, Y. Yang, H. Wang, B. Jia, G. Ma, D. Yu, L. Guo, S. Yang, Direct chitin conversion to N-doped amorphous carbon nanofibers for high-performing full sodium-ion batteries, *Nano Energy*. 45 (2018) 220–228. <https://doi.org/10.1016/j.nanoen.2017.12.042>.

<sup>16</sup> H. Liu, M. Jia, B. Cao, R. Chen, X. Lv, R. Tang, F. Wu, B. Xu, Nitrogen-doped carbon/graphene hybrid anode material for sodium-ion batteries with excellent rate capability, *J. Power Sources*. 319 (2016) 195–201. <https://doi.org/10.1016/j.jpowsour.2016.04.040>.

<sup>17</sup> S. Liu, B. Yang, J. Zhou, H. Song, Nitrogen-rich carbon-onion-constructed nanosheets: An ultrafast and ultrastable dual anode material for sodium and potassium storage, *J. Mater. Chem. A*. 7 (2019) 18499–18509. <https://doi.org/10.1039/c9ta04699b>.

<sup>18</sup> Y. Qu, M. Guo, F. Zeng, C. Zou, C. Yuan, X. Zhang, Q. Li, H. Lu, Synthesis of nitrogen-doped porous carbon nanofibers as an anode material for high performance sodium-ion batteries, *Solid State Ionics*. 337 (2019) 170–177. <https://doi.org/10.1016/j.ssi.2019.04.025>.

<sup>19</sup> Y. Lu, D. Li, C. Lyu, H. Liu, B. Liu, S. Lyu, T. Rosenau, D. Yang, High nitrogen doped carbon nanofiber aerogels for sodium ion batteries: synergy of vacancy defects to boost sodium ion storage, *Appl. Surf. Sci.* 496 (2019) 143717. <https://doi.org/10.1016/j.apsusc.2019.143717>.

<sup>20</sup> L. Sun, J. Xie, X. Zhang, L. Zhang, J. Wu, R. Shao, R. Jiang, Z. Jin, Controllable synthesis of nitrogen-doped carbon nanobubbles to realize high-performance lithium and sodium storage, *Dalt. Trans.* 49 (2020) 15712–15717. <https://doi.org/10.1039/d0dt03258a>.

<sup>21</sup> Kang Ding, Biao Gao, Jijiang Fu, Weili An, Hao Song, Xingxing Li, Qiuyun Yuan, Xuming Zhang, Kaifu Huo, and Paul K. Chu. Intertwined Nitrogen-Doped Carbon Nanotubes for High-Rate and Long-Life Sodium-Ion Battery.pdf, *ChemElectroChem*. 4 (2017) 2542–2546. <https://doi.org/https://doi.org/10.1002/celec.201700590>.

|                                                               |           |                                    |                                                                                                   |
|---------------------------------------------------------------|-----------|------------------------------------|---------------------------------------------------------------------------------------------------|
| <b>N-doped double-shell hollow carbon sphere<sup>22</sup></b> | -         | 674 m <sup>2</sup> g <sup>-1</sup> | 250 mAhg <sup>-1</sup> at 0.06 Ag <sup>-1</sup><br>137 mAhg <sup>-1</sup> at 1.2 Ag <sup>-1</sup> |
| <b>N-doped carbon spheres<sup>23</sup></b>                    | -         | -                                  | 152 mAhg <sup>-1</sup> at 0.05 Ag <sup>-1</sup><br>83 mAhg <sup>-1</sup> at 1 Ag <sup>-1</sup>    |
| <b>hierarchically porous N-doped carbon<sup>24</sup></b>      | 2.1 wt. % | 800 m <sup>2</sup> g <sup>-1</sup> | 205 mAhg <sup>-1</sup> at 0.1 Ag <sup>-1</sup><br>132 mAhg <sup>-1</sup> at 1 Ag <sup>-1</sup>    |

---

<sup>22</sup> L. Bu, X. Kuai, W. Zhu, X. Huang, K. Tian, H. Lu, J. Zhao, L. Gao, Nitrogen-doped double-shell hollow carbon spheres for fast and stable sodium ion storage, *Electrochim. Acta.* 356 (2020) 136804. <https://doi.org/10.1016/j.electacta.2020.136804>

<sup>23</sup> M. Khan, N. Ahmad, K. Lu, Z. Sun, C. Wei, X. Zheng, R. Yang, Nitrogen-doped carbon derived from onion waste as anode material for high performance sodium-ion battery, *Solid State Ionics.* 346 (2020) 115223. <https://doi.org/10.1016/j.ssi.2020.115223>.

<sup>24</sup> J. Ou, L. Yang, Z. Zhang, Chrysanthemum derived hierarchically porous nitrogen-doped carbon as high performance anode material for Lithium/Sodium ion batteries, *Powder Technol.* 344 (2019) 89–95. <https://doi.org/10.1016/j.powtec.2018.11.100>.
